# Supplementary material
Source: PubMed Central journal article supplement (PMC2964349)
Supplement: halms518213-supplement_6.pdf [file halms518213-supplement_6.pdf]

## LEGEND TO SUPPLEMENTAL FIGURES

### **Fig. S1 Expression of LRP1 in fibroblasts and breast cancer cells**

LRP1 $\beta$  protein expression is shown in panel a. Whole cell extracts were subjected to SDS-PAGE and immunoblotting with the anti-LRP1 $\beta$  hybridoma. LRP1 $\beta$  transfected COS lysate was used as a positive control, PEA13 (LRP1-deficient MEF) cells as a negative control, and  $\beta$ -actin as a loading control. LRP1 mRNA was quantified by real-time quantitative RT-PCR (panel b). Mean  $\pm$  s.d. of 3 independent experiments is shown.

### **Fig. S2. Co-purification of endogenous LRP1 with <sup>D231N</sup>cath-D**

D231N cath-D-transfected MEFs (CD55-/-D231N) grown to 90% confluence without medium change for 3 days were lysed in PLC buffer and loaded on an anti-cath-D M1G8 affinity column that binds to 52-, 48-, and 34-kDa forms of cath-D. Eluted fractions were subjected to SDS-PAGE and immunoblotting with the anti-cath-D antibody (top panel) and anti-LRP1 $\beta$  hybridoma (bottom panel).

### **Figure S3. Silencing LRP1 in pro-cath-D secreting MEFs inhibits outgrowth**

CD55-/-cath-D cells transfected with LRP1 siRNA4 or Luc siRNA were embedded in Matrigel 24 h post-transfection (panel a), and analyzed as described in the legend to Figure 7B. LRP1 $\beta$  expression was monitored 24 h post-transfection of CD55-/-cath-D cells with Luc siRNA or LRP1 siRNA4 (panel b). Bars; - - -, 75  $\mu$ m; —, 750  $\mu$ m.

### **Figure S4. LRP1 silencing in HMF fibroblasts prevents pro-cath-D-induced outgrowth**

Phase contrast optical photomicrographs of HMF fibroblasts after 3 days of co-culture are shown in panel a. HMF fibroblasts transfected with Luc siRNA (panel a, top) or LRP1 siRNA2 (panel a,

bottom) were embedded 48h post-transfection in the presence of a bottom layer of 3Y1-Ad12 cancer cell lines secreting no cath-D or human cath-D. LRP1 $\beta$  expression was monitored 48 h post-transfection before the co-culture assays (panel b). Pro-cath-D secretion was analyzed after 3 days of co-culture of Luc or LRP1 siRNA2 HMFs with 3Y1Ad12/control or 3Y1Ad12/cath-D cells by immunoblotting. \*, non-specific contaminant protein. Bars, 75  $\mu$ m.

**Figure S5. LRP1 expression is required for fibroblastic morphology in three-dimensional matrices**

HMF fibroblasts transfected with Luc siRNA, LRP1 siRNA1 or LRP1 siRNA2 were embedded in Matrigel 48h post-transfection (panels a and b). Phase contrast images taken after culturing for 3 days are shown (panels a and b, top) and p-nitrotriazolium violet cell staining after culturing for 5 days is also given (panel a, bottom). Insets illustrate fibroblast morphology. Data from one representative experiment out of 3 is shown. Cells transiently expressing Luc siRNA, LRP1 siRNA1 or LRP1 siRNA2 were analyzed by immunoblotting 48h post-transfection (panels a and b, right). Bars (---, 75  $\mu$ m; -, 750  $\mu$ m).

**SUPPLEMENTAL MATERIALS AND METHODS**

**RNA extraction, RT-PCR and Q-PCR.** RNA extraction and reverse transcription were performed, and Q-PCR was carried out using a LightCycler and the DNA double-strand specific SYBR Green I dye for detection (Roche). Q-PCR was performed using gene-specific oligonucleotides, and results were normalized to RS9 levels.
