# Supplementary material
Source: PubMed Central journal article supplement (PMC2964349)

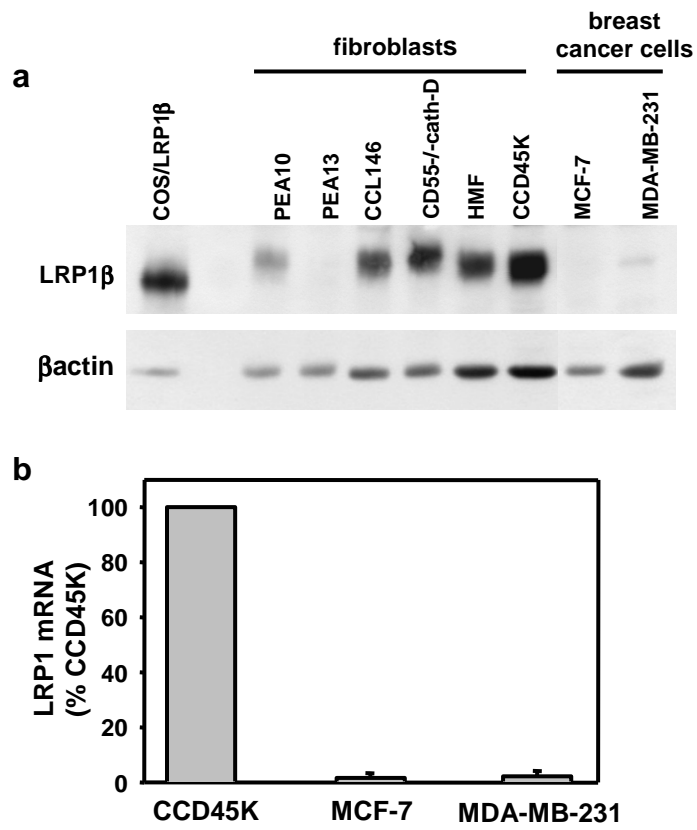

**Figure Sup. 1**

Supplement: halms518213-supplement_1.pdf [file halms518213-supplement_1.pdf]

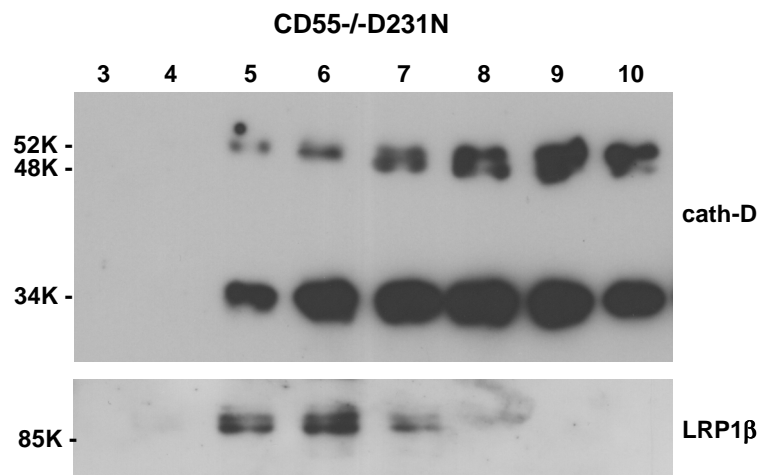

**Figure Sup. 2**

Supplement: halms518213-supplement_2.pdf [file halms518213-supplement_2.pdf]

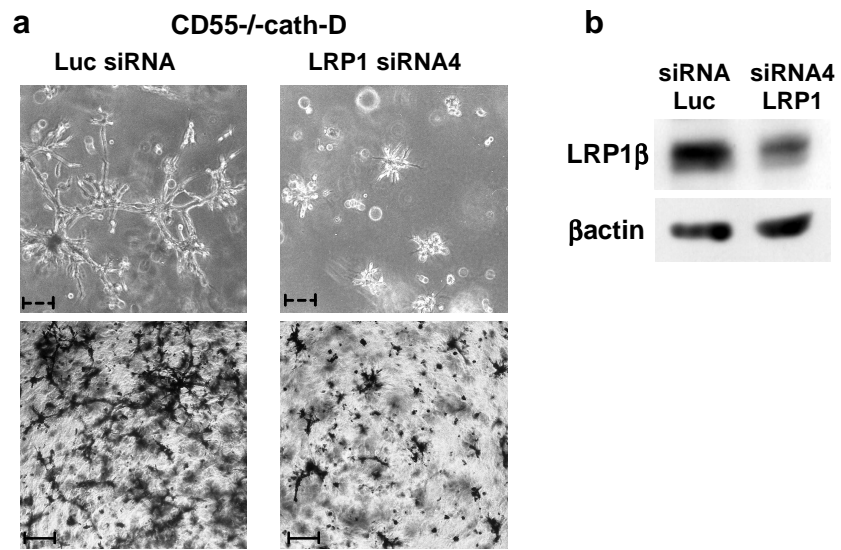

**Figure Sup. 3**

Supplement: halms518213-supplement_3.pdf [file halms518213-supplement_3.pdf]

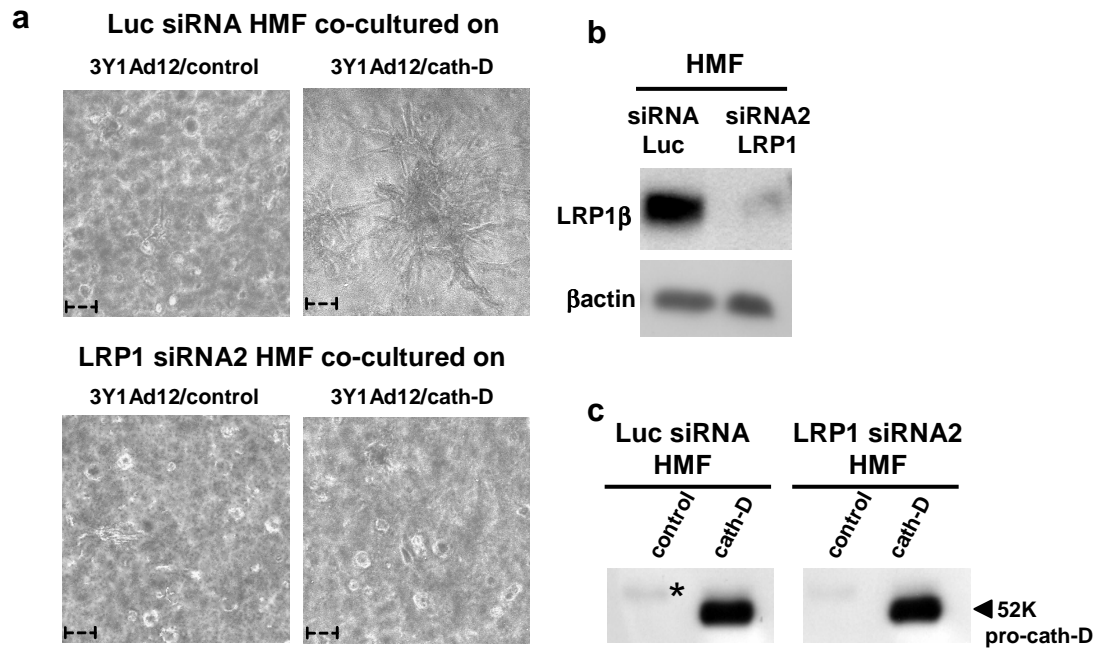

**Figure Sup. 4**

Supplement: halms518213-supplement_4.pdf [file halms518213-supplement_4.pdf]

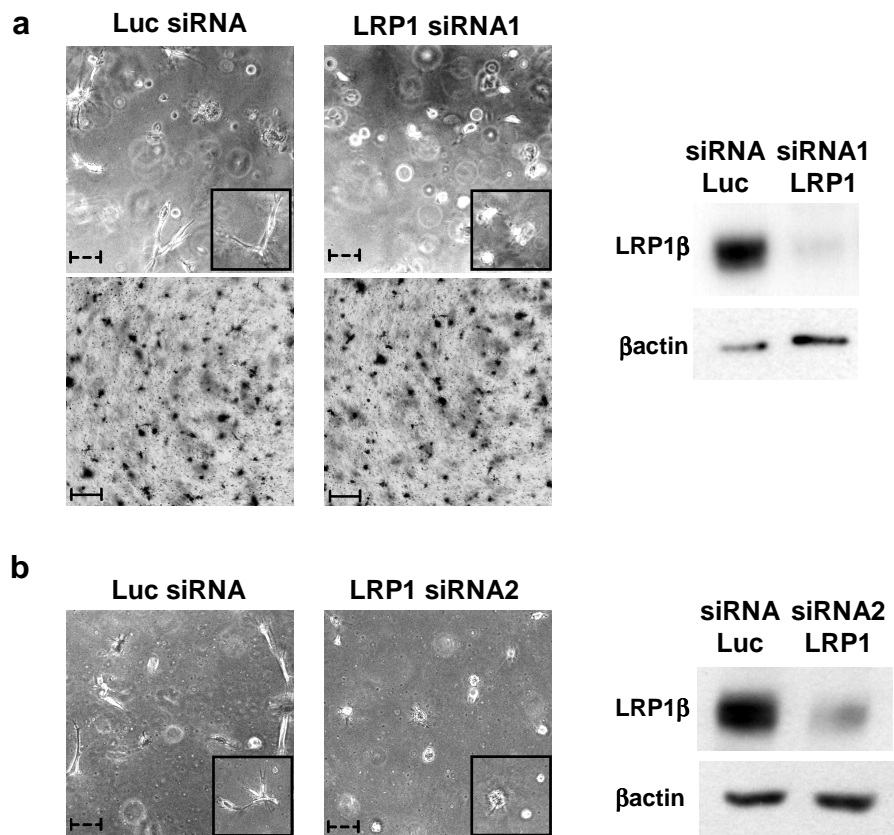

**Figure Sup 5**

Supplement: halms518213-supplement_5.pdf [file halms518213-supplement_5.pdf]
